# Supplementary material for: Angiotensin-Converting Enzyme Inhibition and Parathyroid Hormone Secretion
Source: Hindawi journal article supplement (doi:10.1155/2017/4138783), 2017-01-01

**SUPPLEMENTAL TABLES AND FIGURES**

**Supplemental Table 1.** Effect of baseline normocalcemic vs. hypercalcemic hyperparathyroidism on PTH with intervention.

|                               | Pre-intervention | Post-intervention | Delta, P-value | Two-sample T-test |
|-------------------------------|------------------|-------------------|----------------|-------------------|
| <b>Primary HPT</b>            |                  |                   |                | 0.89              |
| Normocalcemic PTH, pg/ml, N=4 | 77.6 (15.0)      | 68.1 (6.8)        | -8.2, p=0.17   |                   |
| Hypercalcemic PTH, pg/ml, N=9 | 82.2 (24.1)      | 72.2 (24.0)       | -9.4, p=0.18   |                   |

Values are mean (SD) unless otherwise noted.

Normocalcemia defined as medical chart baseline Ca  $\leq$ 10.7mg/dl.

PTH, parathyroid hormone; HPT, hyperparathyroidism.

**Supplemental Table 2.** Effect of baseline vitamin D sufficiency vs. insufficiency on PTH with intervention.

|                                       | Pre-intervention | Post-intervention | Delta, P-value | Two-sample T-test |
|---------------------------------------|------------------|-------------------|----------------|-------------------|
| <b>Total Cohort</b>                   |                  |                   |                |                   |
| PTH, pg/ml when 25OHD <20 ng/ml, n=9  | 64.3 (42.5)      | 58.4 (33.4)       | -5.9, p=0.28   | 0.63              |
| PTH, pg/ml when 25OHD ≥20 ng/ml, n=21 | 50.3 (27.1)      | 45.2 (27.0)       | -3.4, p=0.23   |                   |
| <b>Primary HPT</b>                    |                  |                   |                |                   |
| PTH, pg/ml when 25OHD <20 ng/ml, n=3  | 104.6 (7.1)      | 93.7 (17.6)       | -10.8, p=0.22  | 0.76              |
| PTH, pg/ml when 25OHD ≥20 ng/ml, n=9  | 71.1 (17.7)      | 63.3 (13.8)       | -7.8, p=0.15   |                   |

Values are mean (SD) unless otherwise noted.

PTH, parathyroid hormone; HPT, hyperparathyroidism.

**Supplemental Figure 1. Lisinopril titration protocol.**

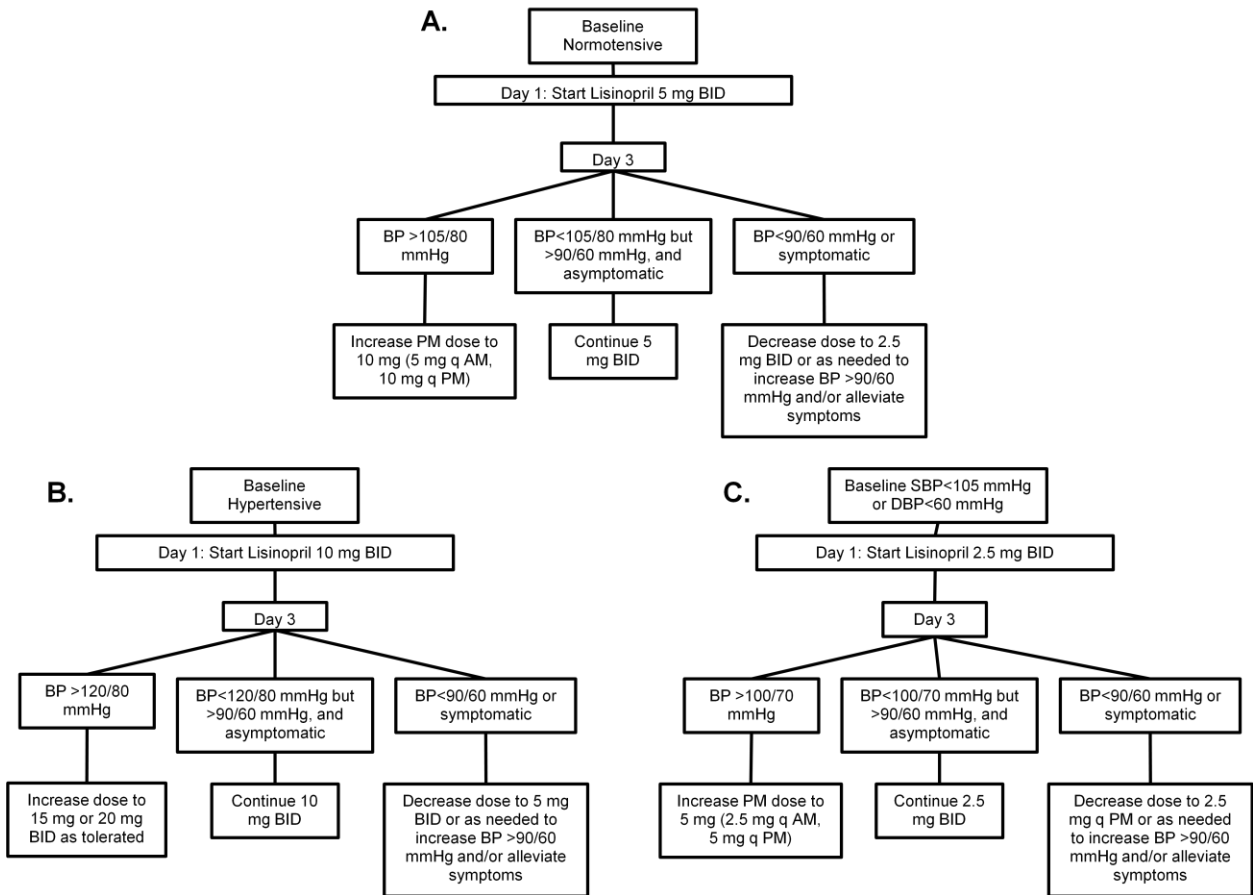

Dosing algorithm A, B, or C based on baseline blood pressure:

A. Normotensive (<140/90 mmHg) at baseline

B. Hypertensive ( $\geq$ 140/90 mmHg) at baseline

C. SBP <105 mmHg or DBP <60 mmHg at baseline

After initial lisinopril dose chosen based on baseline blood pressure, participants monitored their blood pressure at home with a home sphygmomanometer. Home blood pressure readings were reported to study staff and lisinopril dosing was adjusted per protocol.

BP, blood pressure; SBP, systolic blood pressure; DBP, diastolic blood pressure.

**Supplemental Figure 2. Consort Diagram.**

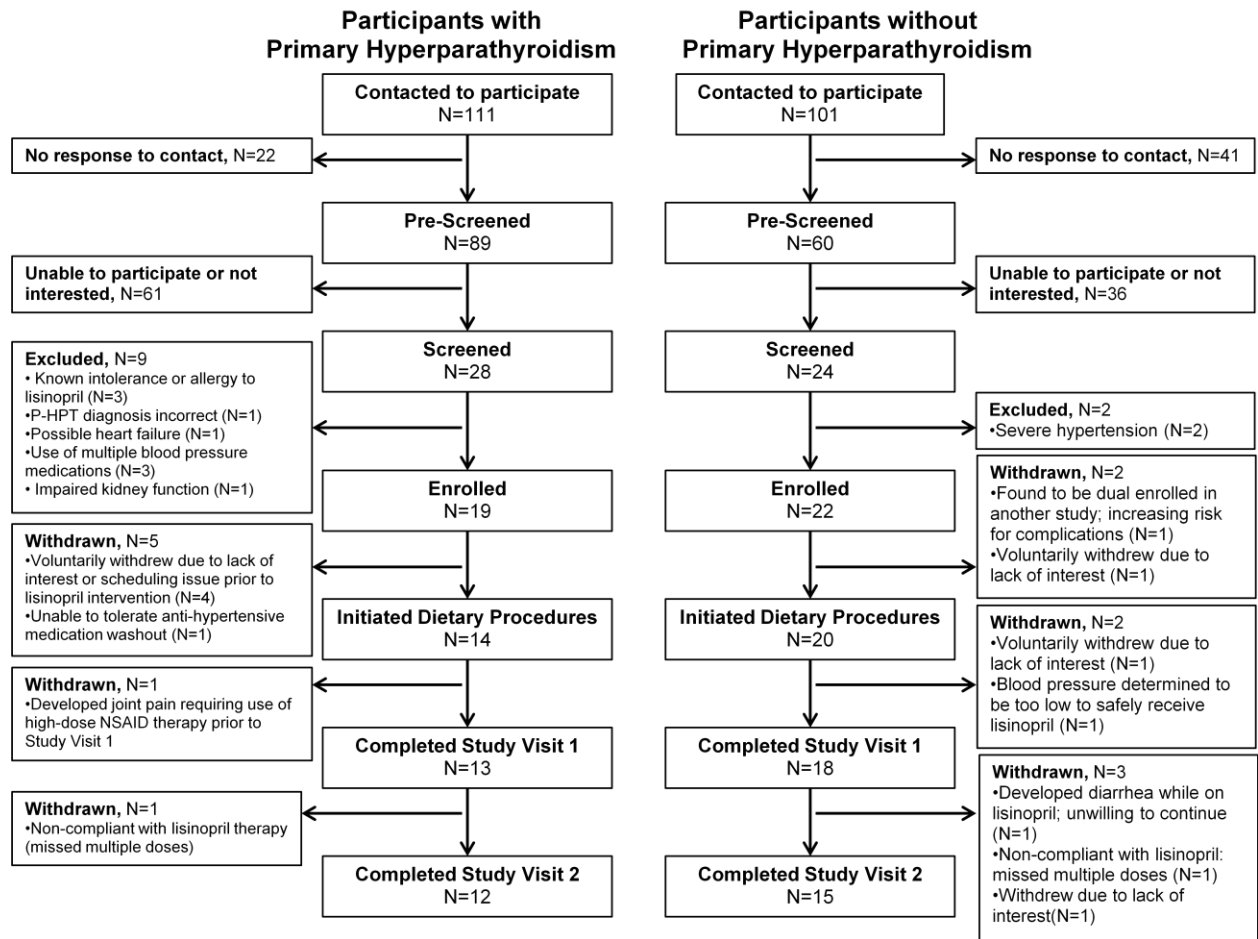

Supplement: f1 [file 4138783.f1.pdf]
